# Supplementary material for: Rhodium-grafted hydrotalcite catalyst for heterogeneous 1,4-addition reaction of organoboron reagents to electron deficient olefins
Source: Royal Society of Chemistry journal article supplement (doi:10.1039/c1gc15146k), 2011-01-01
Supplement: c1gc15146k.pdf [file c1gc15146k.pdf]

*Supporting Information*

**Rhodium-Grafted Hydrotalcite Catalyst for Heterogeneous 1,4-Addition  
Reaction of Organoboron Reagents with Electron Deficient Olefins**

Ken Motokura,<sup>[a]</sup> Norifumi Hashimoto,<sup>[a]</sup> Takayoshi Hara,<sup>[a]</sup> Takato Mitsudome,<sup>[a]</sup>  
Tomoo Mizugaki,<sup>[a]</sup> Koichiro Jitsukawa,<sup>[a]</sup> and Kiyotomi Kaneda\*<sup>[a, b]</sup>

[a] Dr. K. Motokura,<sup>[§]</sup> N. Hashimoto, Dr. T. Hara,<sup>[¶]</sup> Dr. T. Mitsudome, Dr. T. Mizugaki, Prof. Dr. K. Jitsukawa, Prof. Dr. K. Kaneda

Department of Materials Engineering Science, Graduate School of Engineering Science, Osaka University, 1-3 Machikaneyama, Toyonaka, Osaka 560-8531 (Japan)

[b] Research Center for Solar Energy Chemistry, Osaka University, 1-3 Machikaneyama, Toyonaka, Osaka 560-8531 (Japan)

Fax: (+81) 6-6850-6260

E-mail: kaneda@cheng.es.osaka-u.ac.jp

[§] Current address: Interdisciplinary Graduate School of Science and Engineering, Department of Environmental Chemistry and Engineering, Tokyo Institute of Technology, 4259 Nagatsuta-cho, Midori-ku, Yokohama 226-8502 (Japan)

[¶] Current address: Graduate School of Engineering, Chiba University, 1-33 Yayoi, Inage, Chiba, 263-8522 (Japan)

**Table of contents**

1. EXAFS oscillations and curve-fitting analysis results.
2. Kinetic studies

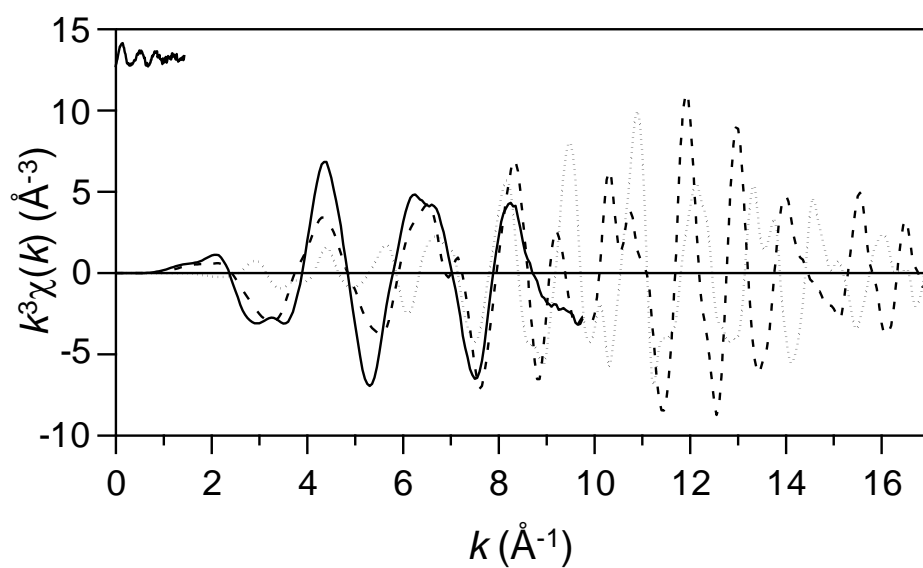

**Fig. 1S** The  $k^3$ -weighted Rh K-edge EXAFS oscillations for Rh foil (dotted line,  $\times 0.25$ ),  $\text{Rh}_2\text{O}_3$  (dashed line,  $\times 0.66$ ), and fresh Rh/HT catalyst (solid line).

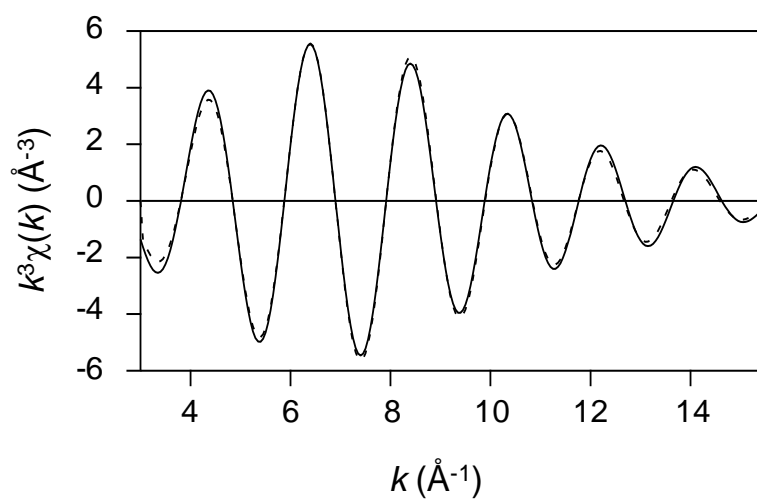

**Fig. 2S** Curve-fitting analysis was performed with the inverse FT of the  $1.16 \text{ \AA} < r < 1.90 \text{ \AA}$  range using hexagonal  $\text{Rh}_2\text{O}_3$  as a standard material. The solid curve was obtained experimentally, and the dashed curve is the calculated fit.

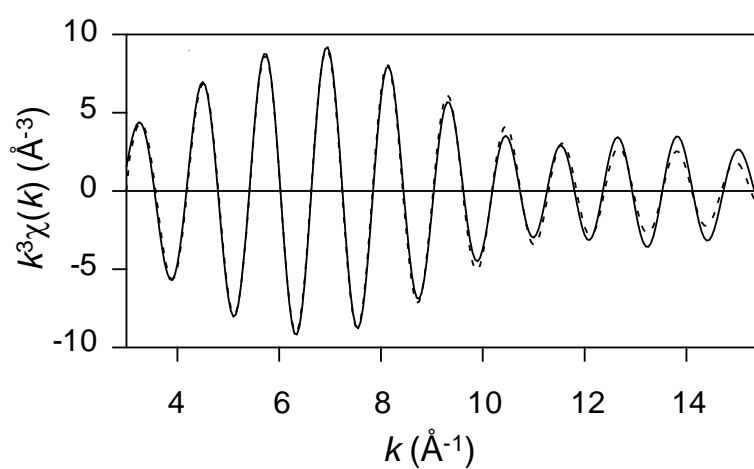

**Fig. 3S** Curve-fitting analysis was performed with the inverse FT of the  $2.21 \text{ Å} < r < 2.98 \text{ Å}$  range using Rh-(O)-Mg shell parameter. The solid curve was obtained experimentally, and the dashed curve is the calculated fit.

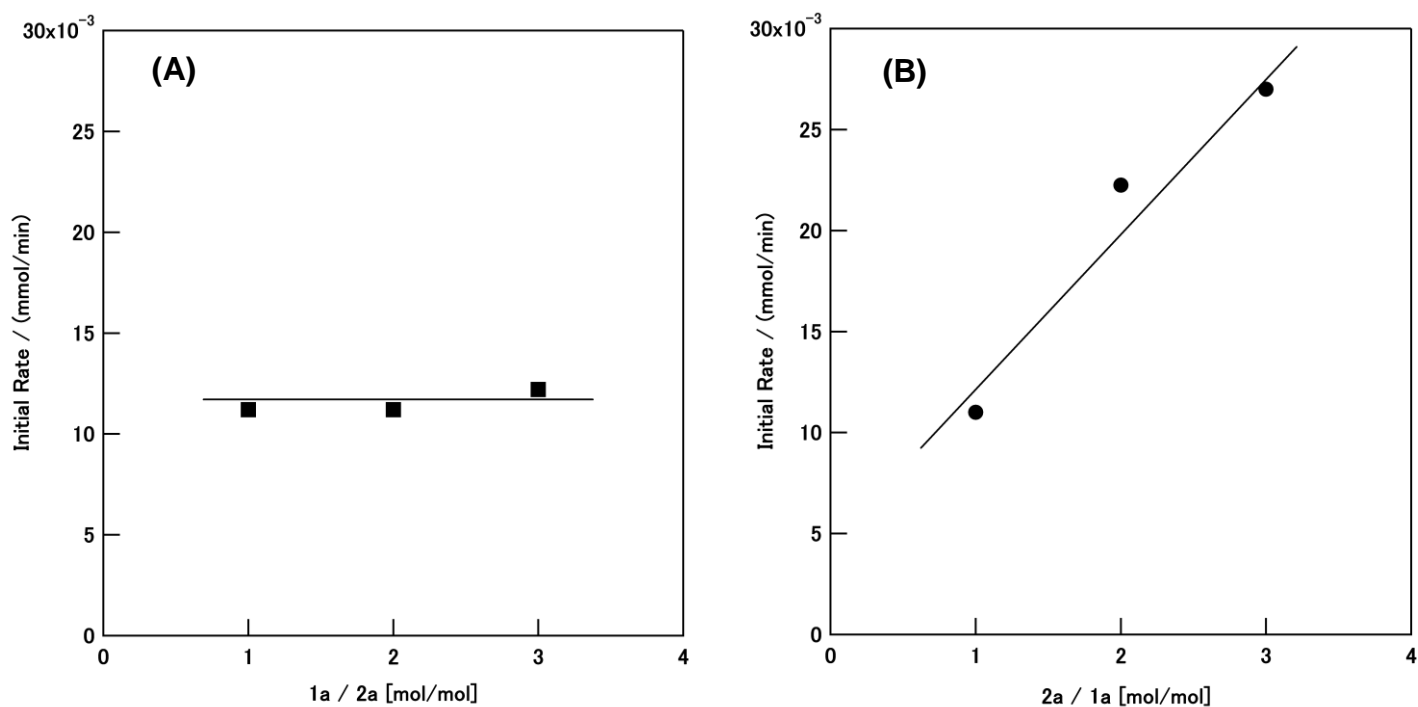

**Fig. 4S** Dependences of the initial formation rate of **3a** on the amount of **1a** (A) and **2a** (B).

Reaction conditions for (A): **1a** 1-3 mmol, **2a** 1 mmol, Rh/HT ( $2.0 \times 10^{-2}$  g, Rh:  $4 \times 10^{-3}$  mmol), 1,4-dioxane (2 mL), 1,5-COD ( $4 \times 10^{-3}$  mmol), H<sub>2</sub>O 0.1 mL, 100 °C, Ar, 30 min, for (B): **1a** 1 mmol, **2a** 1-3 mmol, Rh/HT ( $2.0 \times 10^{-2}$  g, Rh:  $4 \times 10^{-3}$  mmol), 1,4-dioxane (2 mL), 1,5-COD ( $4 \times 10^{-3}$  mmol), H<sub>2</sub>O 0.1 mL, 100 °C, Ar, 30 min,
